# Supplementary material for: Prevalence of Co-Infections with Respiratory Viruses in Individuals Investigated for SARS-CoV-2 in Ontario, Canada
Source: MDPI journal article supplement (doi:10.3390/v13010130), 2021-01-18
Supplement: s1 [file s1]

**Figure S1. Diagram of specimens included in SARS-CoV-2 co-infection study**  
**Study period: January 11 – April 20, 2020**

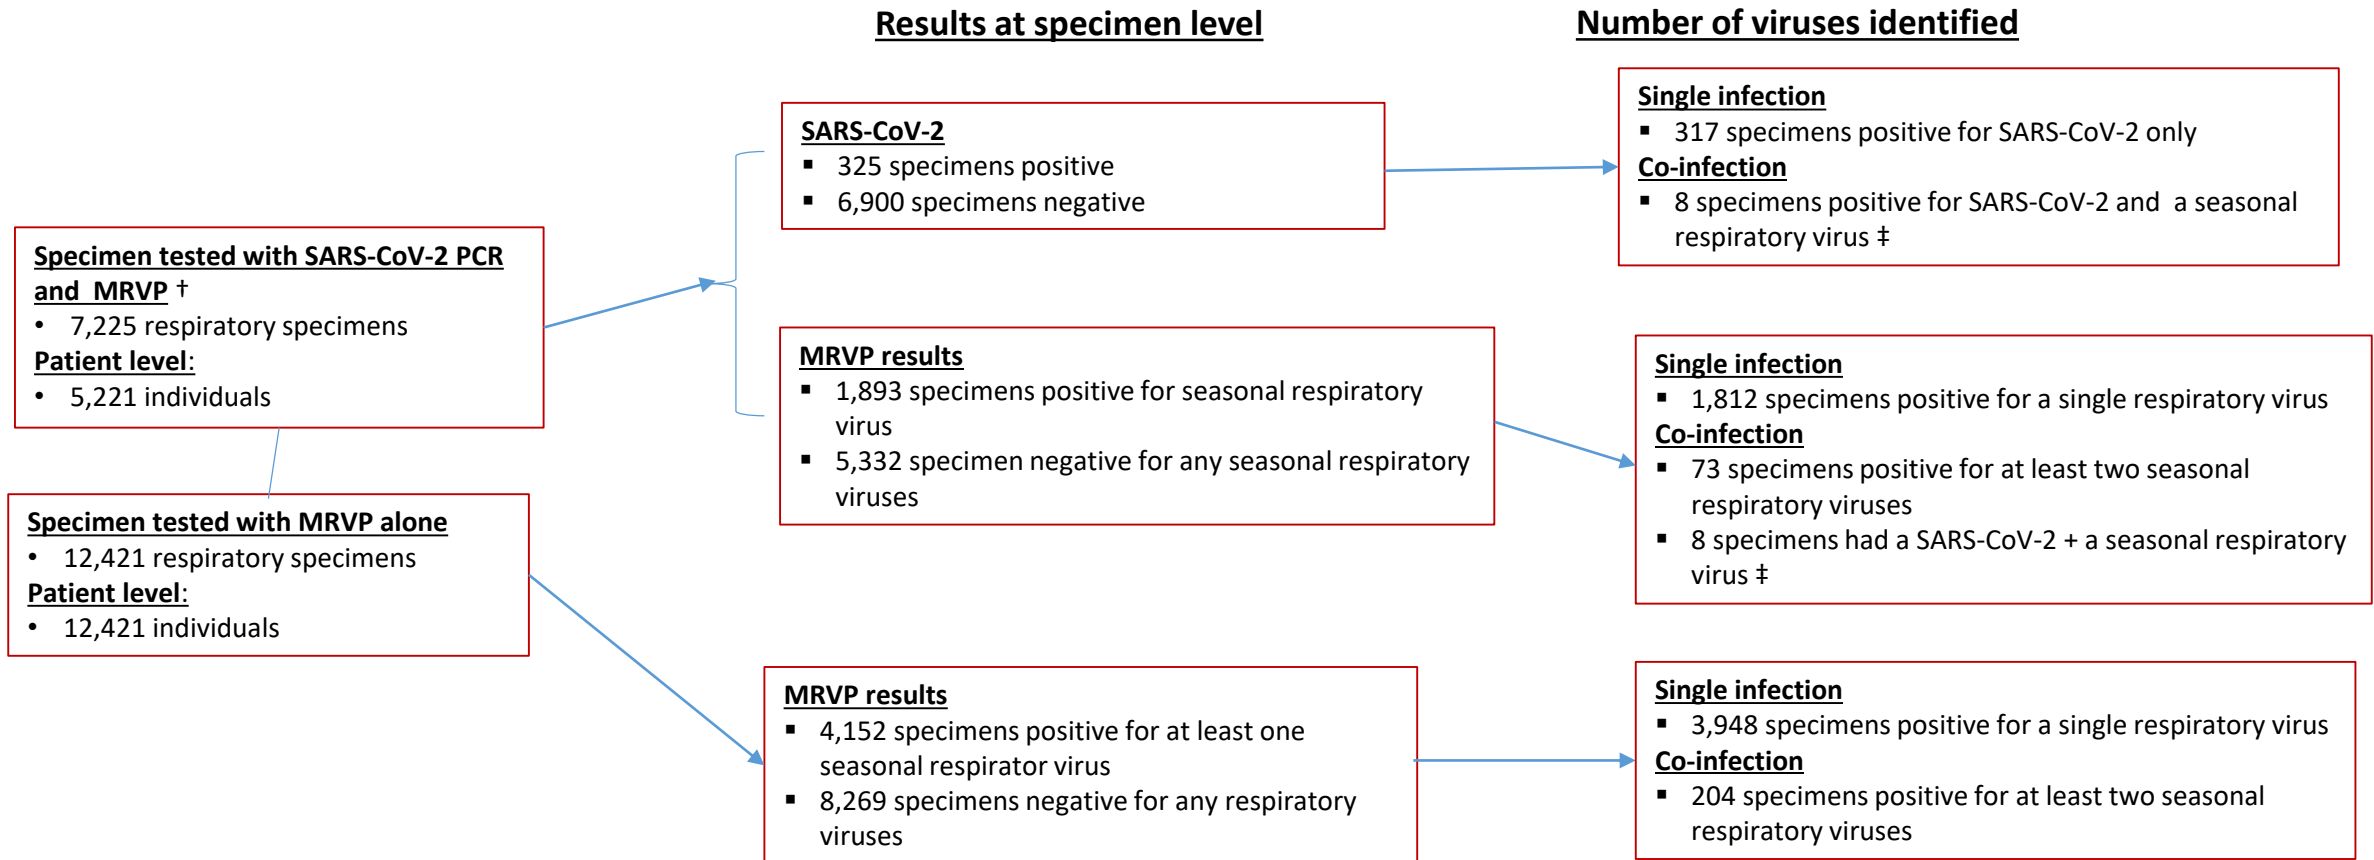

**Footnote:** † MRVP - Multiplex Respiratory Virus PCR assay;  
 ‡ 8 specimens with SARS-CoV-2 co-infection identified represent the same specimens.
